# Supplementary material
Source: PubMed Central journal article supplement (PMC3435219)
Supplement: 1201232109_pnas.201201232SI.pdf [file 1201232109_pnas.201201232SI.pdf]

# Supporting Information

Couto et al. 10.1073/pnas.1201232109

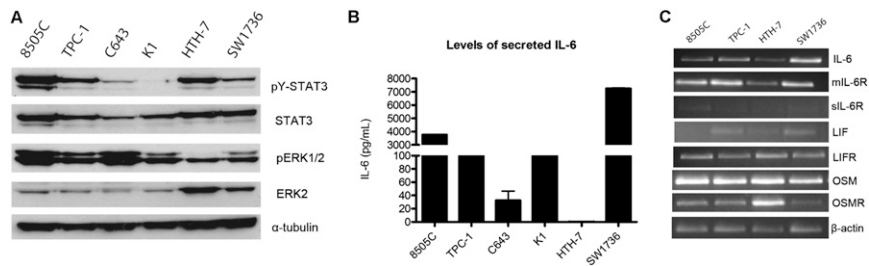

**Fig. S1.** (A) STAT3 Y705 phosphorylation (pY-STAT3) is heterogeneously expressed in thyroid cancer-derived cell lines (TCCs). Total extracts from the indicated TCCs were probed with the indicated antibodies;  $\alpha$ -tubulin was the loading control. (B) Levels of IL-6 present in serum-free conditioned medium from the indicated TCCs were measured by ELISA (mean  $\pm$  SD). (C) RT-PCR showing RNA levels of *IL-6*, leukemia inhibitory factor (LIF), and oncostatin M as well as their receptors [membrane *IL-6* receptor, soluble *IL-6* receptor, LIF receptor, and oncostatin M receptor, respectively] in TCCs.  $\beta$ -actin was used for normalization.

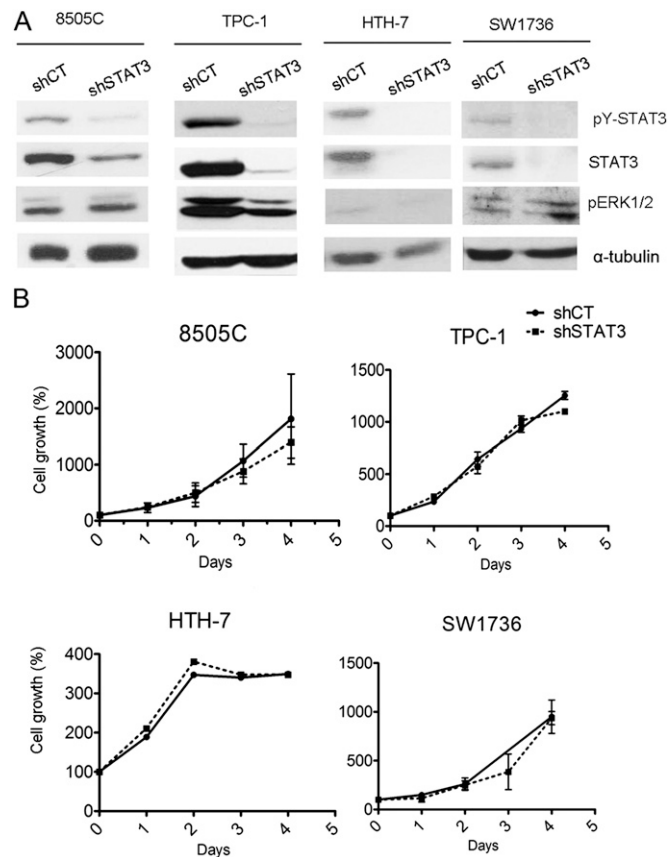

**Fig. S2.** STAT3 knockdown in thyroid cancer cell lines does not alter in vitro cell growth. (A) Extracts from 8505C, TPC-1, HTH-7, and SW1736 cell lines stably transfected with control lentivirus short hairpin control (shCT) and a lentivirus containing a short hairpin targeting STAT3 (shSTAT3) were analyzed by Western blotting for pY-STAT3, STAT3, pERK1/2, and  $\alpha$ -tubulin. (B) Proliferation of shSTAT3 and shCT expressing cell lines was determined by Calcein AM quantification daily over 4 d.

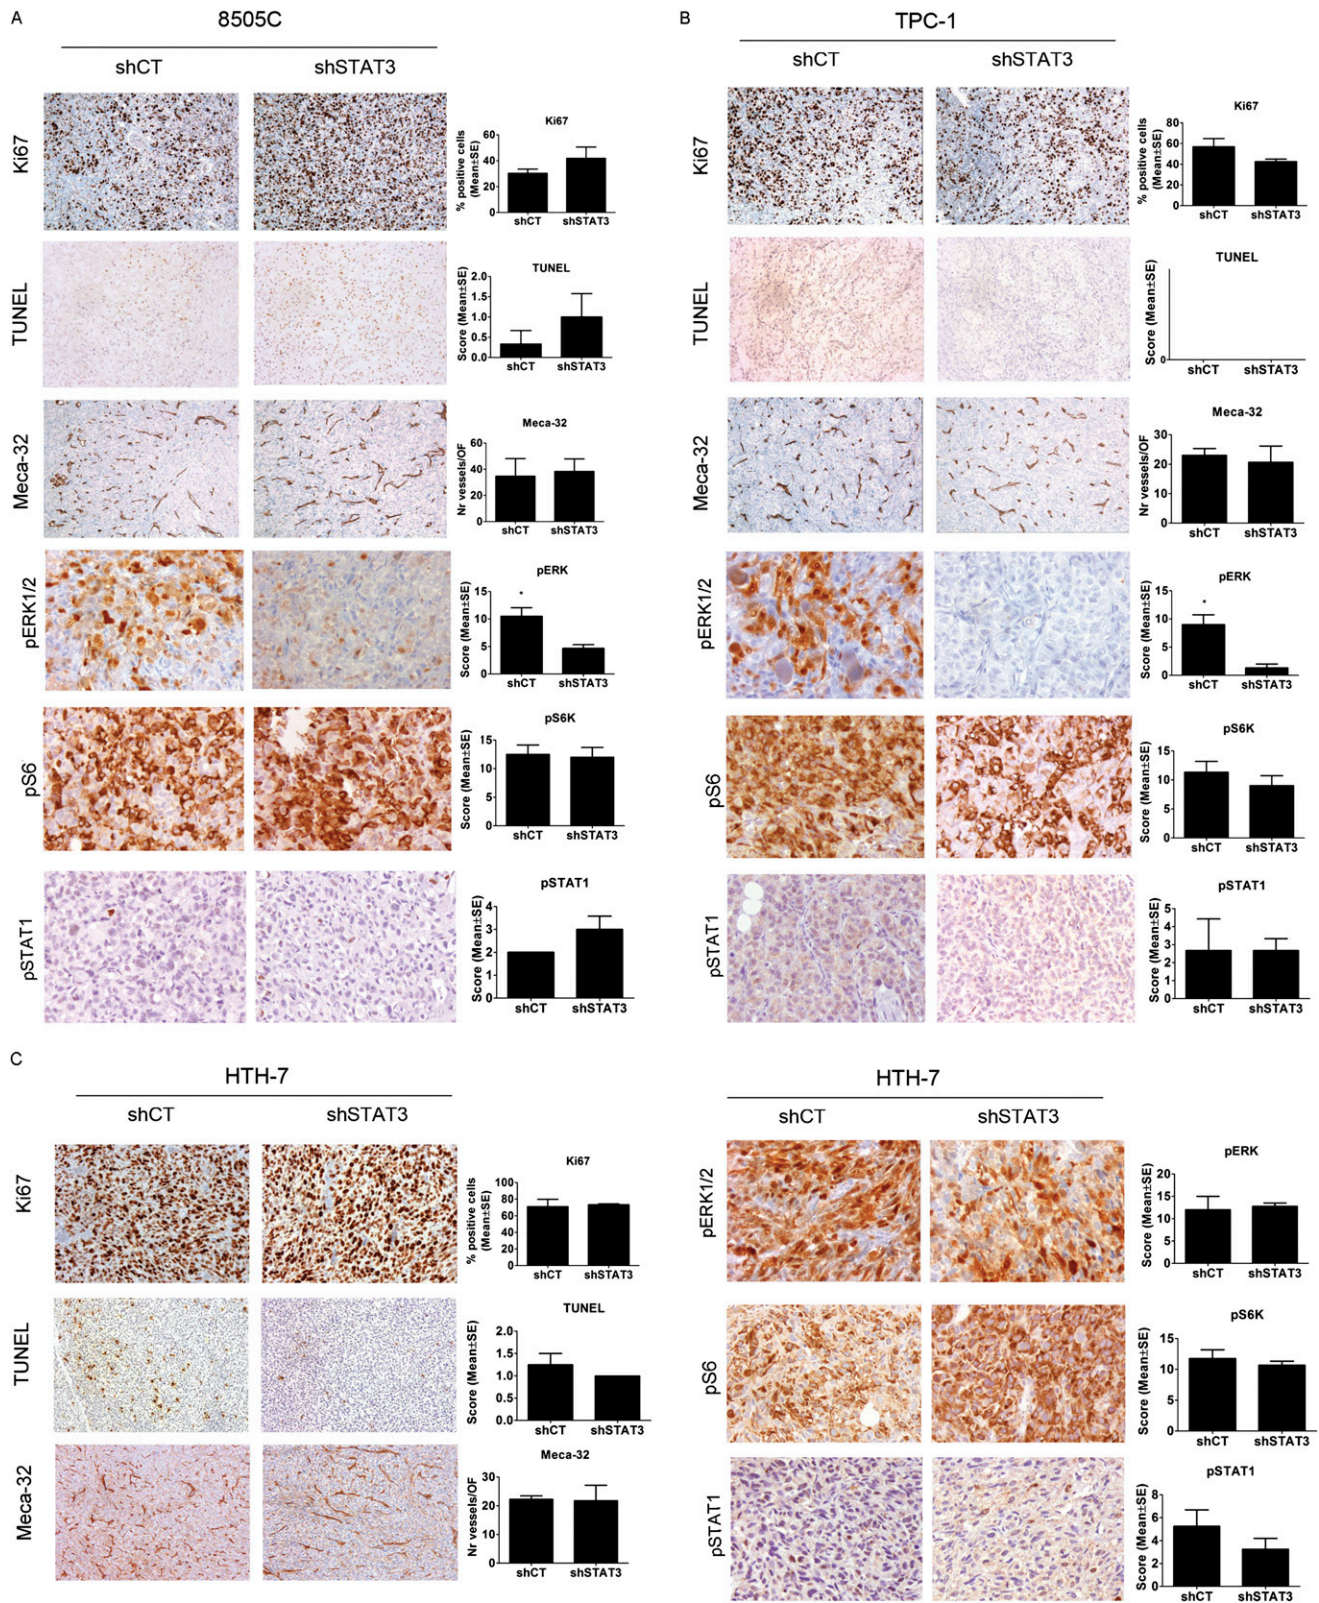

**Fig. S3.** shSTAT3 tumors do not show a significant increase in proliferation, apoptosis, and angiogenesis. Sections from 8505C (A), TPC-1 (B), and HTH-7 (C) shCT and shSTAT3 tumors were immunostained for markers of proliferation (protein Ki67), apoptosis (TUNEL), and angiogenesis (Meca-32) as well as pERK1/2 (*t* test  $P < 0.05$ ), pS6, and pSTAT1. Quantification is represented on the right. (Magnification: 200 $\times$ .) \* $P < 0.05$ .





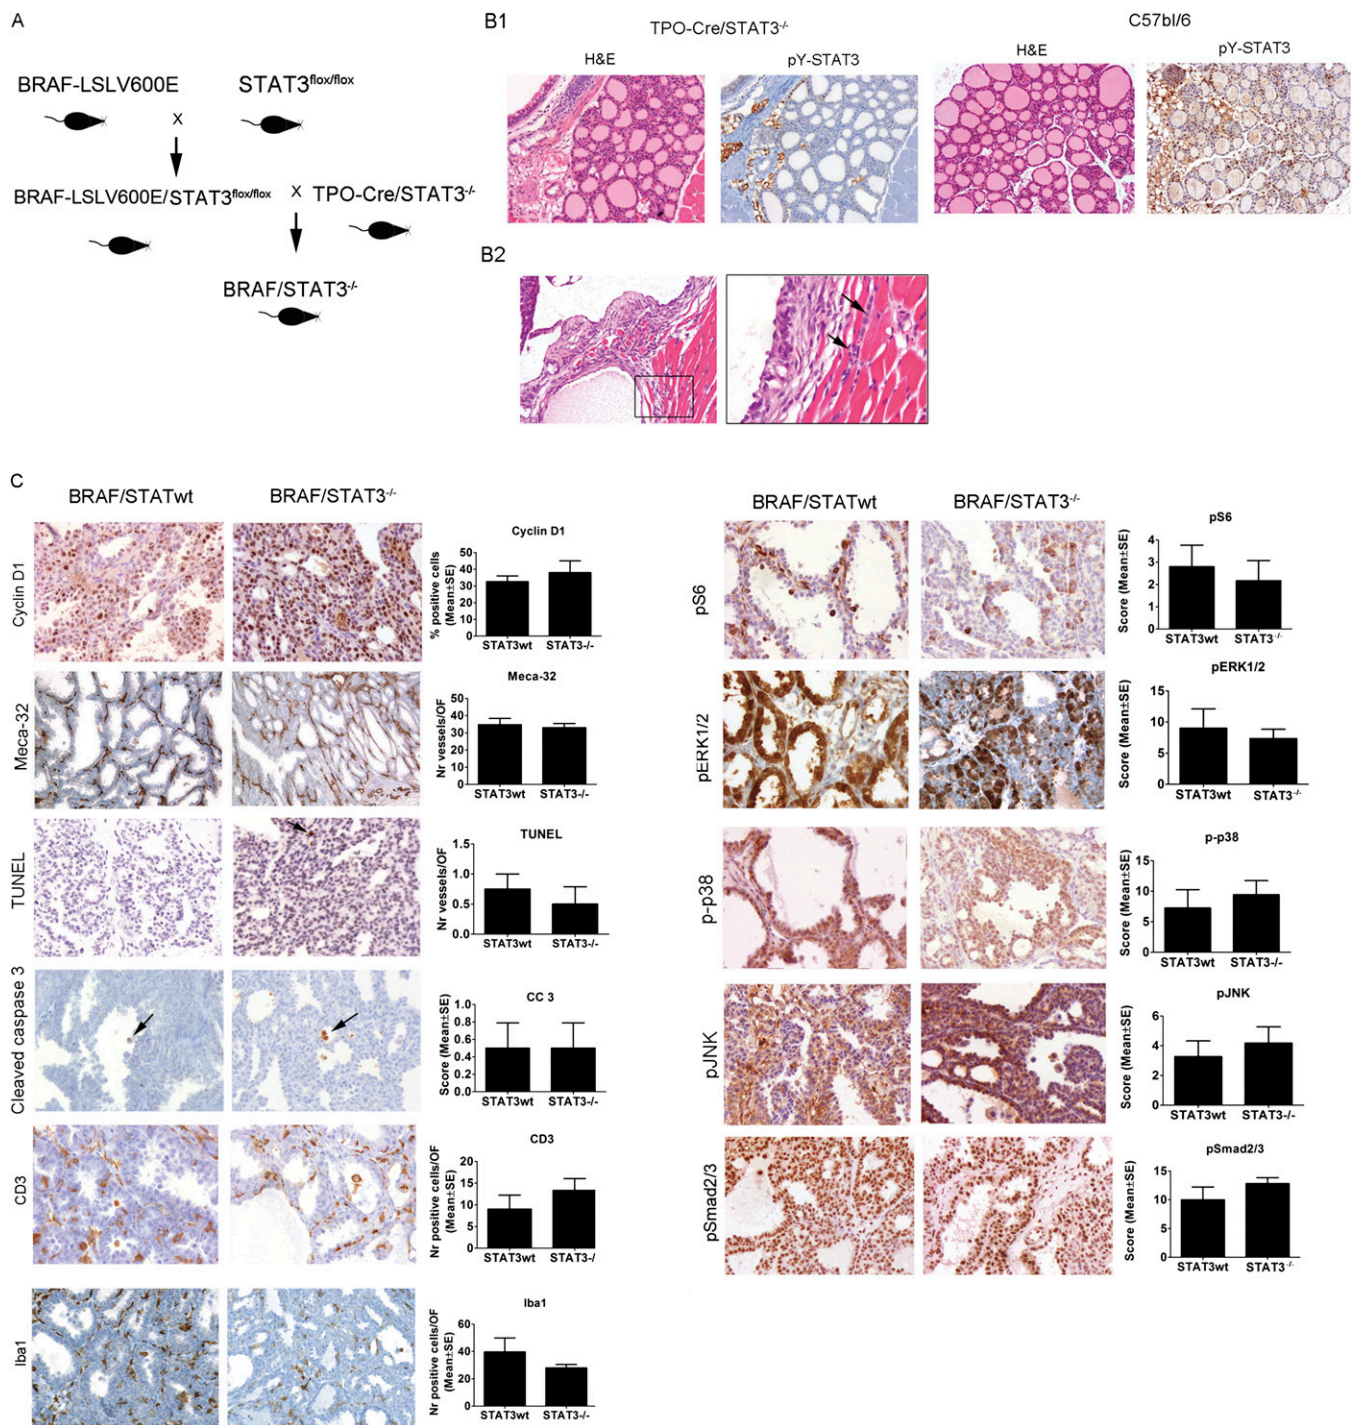

**Fig. 55.** (A) Schematic representation of v-RAF murine sarcoma viral oncogene homolog B (BRAF)/STAT3<sup>-/-</sup> mice generation. (B, 1) STAT3 deficiency in normal thyrocytes does not alter thyroid histological morphology. Representative H&Es and pY-STAT3 staining of the thyroid glands from 5-wk-old thyroid peroxidase-Cre/STAT3<sup>-/-</sup> and 5-wk-old C57Bl/6 WT mice. (B, 2) At 5 wk of age, both STAT3wt and STAT3<sup>-/-</sup> mice showed skeletal muscle invasion (arrows). (C) Representative sections from BRAF/STAT3wt STAT3<sup>-/-</sup> mice were immunostained for the expression of markers of proliferation (cyclin D1), angiogenesis (Meca-32), apoptosis (TUNEL/cleaved-caspase 3), T cells (CD3), and macrophages (Iba1) as well as the activation of v-akt murine thymoma viral oncogene homolog 1 (AKT) (pS6), MAPK (pERK, p-p38, and pJNK), and TGF- $\beta$  (pSmad2/3) signaling. (Magnification: 200 $\times$ ; Meca-32, 100 $\times$ .) Quantification of at least six different animals is represented in the bar graphs (mean  $\pm$  SEM).

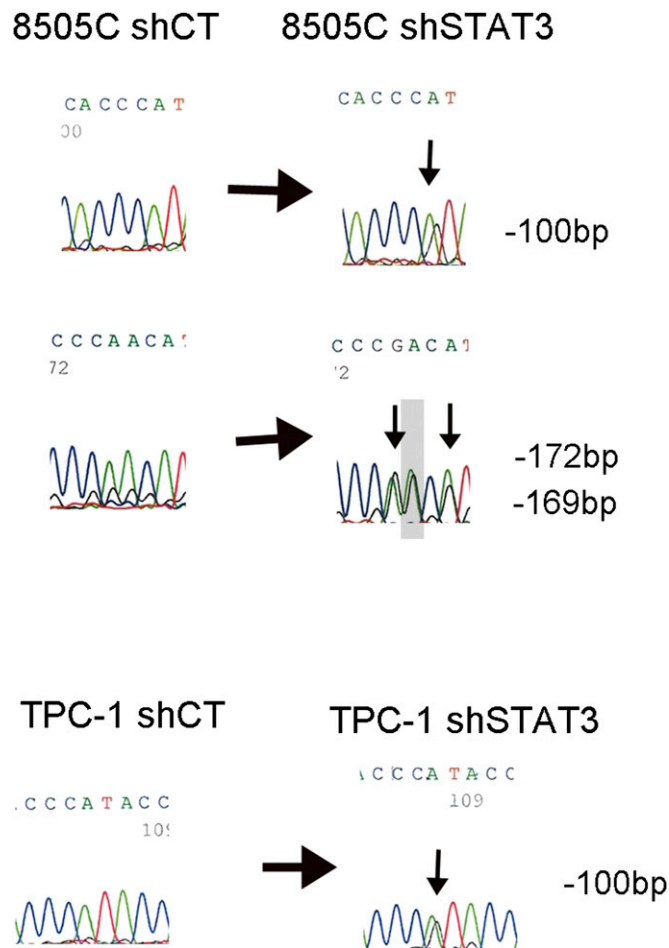

**Fig. S6.** shSTAT3 TCCs show additional cytosine methylation of the *insulin-like growth factor binding protein 7 (IGFBP7)* promoter. Bisulfite sequencing (reverse strand) of the -237- to +10-bp region of the *IGFBP7* promoter in 8505C and TPC-1 shCT and shSTAT3 cell lines. Arrows point at partially methylated cytosines (reverse is G), and numbers indicate their location in the promoter. The gray bar represents a polymorphic site.

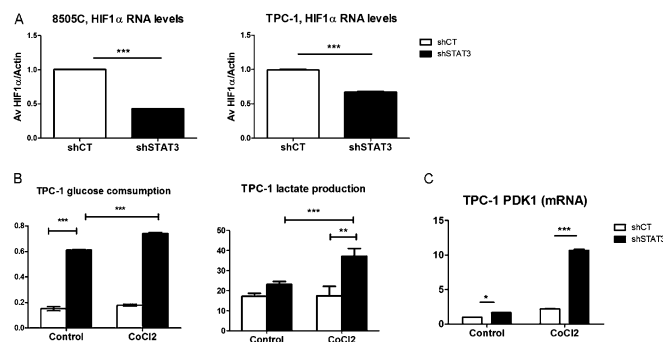

**Fig. S7.** *HIF1A* RNA levels, glucose uptake, lactate production and *PDK1* RNA levels in TPC-1 shCT and shSTAT3 cell lines treated with cobalt chloride (100  $\mu$ m) for 24 hours. (A) *HIF1A* RNA levels were determined by Taqman RT-PCR and normalized to  $\beta$ -actin. Bars are mean  $\pm$  SEM,  $n = 3$ . (B) Glucose uptake was determined by subtracting the glucose concentration in the supernatant to the initial concentration in fresh medium RPMI. Lactate was measured in cell's supernatant. Results were normalized to protein amount (milligrams). Bars represent mean  $\pm$  SEM,  $n = 3$ . (C) *PDK1* RNA levels were determined by Taqman RT-PCR and normalized to  $\beta$ -actin. Bars are mean  $\pm$  SEM,  $n = 3$ . \* $P < 0.05$ , \*\* $P < 0.01$ , \*\*\* $P < 0.0001$ .

**Table S1. Summary of the genetic alterations present in ERK/MAPK signaling effectors in the TCCs used in this study (1, 2)**

| Cell line | Original lesion                    | RAS       | RET      | BRAF  |
|-----------|------------------------------------|-----------|----------|-------|
| 8505C     | Undifferentiated thyroid carcinoma | WT        | WT       | V600E |
| TPC-1     | Papillary thyroid carcinoma        | WT        | RET/PTC1 | WT    |
| C643      | Undifferentiated thyroid carcinoma | HRAS G13R | WT       | WT    |
| K1        | Papillary thyroid carcinoma        | WT        | WT       | V600E |
| HTH-7     | Undifferentiated thyroid carcinoma | NRAS Q61R | WT       | WT    |
| SW1736    | Undifferentiated thyroid carcinoma | WT        | WT       | V600E |

BRAF, v-RAF murine sarcoma viral oncogene homolog B; HRAS, v-Ha-ras Harvey rat sarcoma viral oncogene homolog; NRAS, neuroblastoma RAS viral (v-ras) oncogene homolog; PTC is not written in this table. RAS, rat sarcoma virus oncogene; RET, rearranged during transfection; cell line SW1736.

1. Meireles AM, et al. (2007) Molecular and genotypic characterization of human thyroid follicular cell carcinoma-derived cell lines. *Thyroid* 17:707–715.
2. Ricarte-Filho JC, et al. (2009) Mutational profile of advanced primary and metastatic radioactive iodine-refractory thyroid cancers reveals distinct pathogenetic roles for BRAF, PIK3CA, and AKT1. *Cancer Res* 69:4885–4893.

**Table S2. Differentially expressed genes between shCT and shSTAT3 cell lines that were identified by genome expression analysis**

| Genes                                                      | Variation      | Cell lines          |
|------------------------------------------------------------|----------------|---------------------|
| <b>Inflammation</b>                                        |                |                     |
| Chemokine (C-C motif) ligand 2                             | Down-regulated | 8505C; HTH-7        |
| IL-13 receptor, $\alpha$ -2                                | Down-regulated | 8505C; HTH-7        |
| TNF receptor superfamily, member 21                        | Down-regulated | 8505C; HTH-7        |
| <b>Growth factor signaling</b>                             |                |                     |
| IGFBP7                                                     | Down-regulated | 8505C; HTH-7        |
| TGF, $\beta$ -receptor II                                  | Down-regulated | 8505C; HTH-7        |
| <b>Extracellular matrix</b>                                |                |                     |
| EGF-containing fibulin-like extracellular matrix protein 1 | Down-regulated | 8505C; TPC-1; HTH-7 |
| Collagen, type V, $\alpha$ -1                              | Down-regulated | 8505C; HTH-7        |
| Matrix metalloproteinase 3                                 | Up-regulated   | 8505C; HTH-7        |

The list is restricted to genes with expression that was altered in the same direction in at least two of the cell lines.

**Dataset S1. List of differentially regulated genes in shSTAT3 vs. shCT thyroid cancer cell lines ( $P < 0.05$ )**

[Dataset S1](#)
